# Supplementary material for: Use of intravenous sodium bicarbonate in neonatal intensive care units in Italy: a nationwide survey
Source: Springer Nature journal article supplement (doi:10.1186/s13052-021-00955-3), 2021-03-11
Supplement: MOESM2 [file 18955824]

List of contacted Neonatal Intensive Care Units (n = 120). 117 units participated in the survey, 3 units did not participate in the survey.

| <b>Neonatal Intensive Care Unit</b>                              | <b>City</b>      | <b>Region</b>         |
|------------------------------------------------------------------|------------------|-----------------------|
| Università G. d'Annunzio                                         | Chieti           | Abruzzo               |
| Presidio Ospedaliero S. Salvatore                                | L'Aquila         | Abruzzo               |
| Ospedale Civile dello Spirito Santo                              | Pescara          | Abruzzo               |
| Azienda Ospedaliera San Carlo                                    | Potenza          | Basilicata            |
| Azienda Ospedaliera "Pugliese - Ciaccio"                         | Catanzaro        | Calabria              |
| Azienda Ospedaliera Cosenza                                      | Cosenza          | Calabria              |
| Ospedale Civile San Giovanni di Dio                              | Crotone          | Calabria              |
| Azienda Ospedaliera Reggio Calabria                              | Reggio Calabria  | Calabria              |
| Ospedale S. Giuseppe Moscati                                     | Avellino         | Campania              |
| Ospedale S. Maria Della Speranza                                 | Battipaglia      | Campania              |
| Ospedale Rummo                                                   | Benevento        | Campania              |
| Ospedale Sacro Cuore - Fatebenefratelli                          | Benevento        | Campania              |
| Azienda Ospedaliera di Caserta                                   | Caserta          | Campania              |
| PO "Pineta Grande"                                               | Castel Volturno  | Campania              |
| Azienda Ospedaliera Monaldi                                      | Napoli           | Campania              |
| Fondazione Evangelica Betania - Ospedale Evangelico di Napoli    | Napoli           | Campania              |
| Azienda Universitaria Policlinico Federico II                    | Napoli           | Campania              |
| Ospedale Buon Consiglio - Fatebenefratelli                       | Napoli           | Campania              |
| Ospedale Santissima Annunziata                                   | Napoli           | Campania              |
| A.O.R.N. Santobono Pausilipon                                    | Napoli           | Campania              |
| Nocera Inferiore - Pagani                                        | Nocera Inferiore | Campania              |
| AOU OO. RR. S. Giovanni di Dio e Ruggi d'Aragona                 | Salerno          | Campania              |
| Ospedale Maggiore                                                | Bologna          | Emilia Romagna        |
| Azienda Ospedaliera Policlinico S. Orsola - Malpighi             | Bologna          | Emilia Romagna        |
| Ospedale Bufalini                                                | Cesena           | Emilia Romagna        |
| Azienda Ospedaliera Universitaria S. Anna                        | Ferrara          | Emilia Romagna        |
| Azienda Ospedaliera Policlinico                                  | Modena           | Emilia Romagna        |
| Azienda Ospedaliera Universitaria                                | Parma            | Emilia Romagna        |
| Ospedale di Ravenna                                              | Ravenna          | Emilia Romagna        |
| Ospedale Santa Maria Nuova                                       | Reggio Emilia    | Emilia Romagna        |
| Ospedale Infermi                                                 | Rimini           | Emilia Romagna        |
| Ospedale Santa Maria degli Angeli di Pordenone                   | Pordenone        | Friuli Venezia Giulia |
| IRCCS Burlo Garofolo                                             | Trieste          | Friuli Venezia Giulia |
| Ospedale Santa Maria della Misericordia                          | Udine            | Friuli Venezia Giulia |
| AO San Camillo - Forlanini                                       | Roma             | Lazio                 |
| Policlinico Universitario Umberto I                              | Roma             | Lazio                 |
| Azienda Ospedaliera San Giovanni Addolorata                      | Roma             | Lazio                 |
| Ospedale Pediatrico Bambino Gesù                                 | Roma             | Lazio                 |
| Ospedale Sant'Eugenio                                            | Roma             | Lazio                 |
| Ospedale Fatebenefratelli San Pietro                             | Roma             | Lazio                 |
| Ospedale Fatebenefratelli San Giovanni Calibita - Isola Tiberina | Roma             | Lazio                 |
| Policlinico Casilino                                             | Roma             | Lazio                 |
| Fondazione Policlinico Agostino Gemelli                          | Roma             | Lazio                 |
| Ospedale Belcolle                                                | Viterbo          | Lazio                 |
| Ospedale San Martino                                             | Genova           | Liguria               |
| Istituto Giannina Gaslini                                        | Genova           | Liguria               |
| ASST Papa Giovanni XXIII                                         | Bergamo          | Lombardia             |
| ASST Spedali Civili                                              | Brescia          | Lombardia             |

|                                                                    |                           |           |
|--------------------------------------------------------------------|---------------------------|-----------|
| Fondazione Poliambulanza Istituto Ospedaliero                      | Brescia                   | Lombardia |
| Ospedale Valduce                                                   | Como                      | Lombardia |
| Ospedale Alessandro Manzoni                                        | Lecco                     | Lombardia |
| Ospedale Maggiore                                                  | Lodi                      | Lombardia |
| Ospedale Poma                                                      | Mantova                   | Lombardia |
| ASST Fatebenefratelli Sacco Ospedale Macedonio Melloni             | Milano                    | Lombardia |
| ASST Fatebenefratelli Sacco Ospedale dei Bambini Vittore Buzzi     | Milano                    | Lombardia |
| ASST Grande Ospedale Metropolitano Niguarda                        | Milano                    | Lombardia |
| Fondazione IRCCS Ca' Granda Ospedale Maggiore Policlinico          | Milano                    | Lombardia |
| Azienda Ospedaliera San Gerardo                                    | Monza                     | Lombardia |
| Fondazione IRCCS Policlinico San Matteo                            | Pavia                     | Lombardia |
| Ospedale di Rho                                                    | Rho                       | Lombardia |
| ASST Lariana Ospedale Sant'Anna                                    | San Fermo della Battaglia | Lombardia |
| Azienda Ospedaliera Bolognini Seriate                              | Seriate                   | Lombardia |
| Ospedale F. Del Ponte                                              | Varese                    | Lombardia |
| Ospedale Pediatrico Salesi                                         | Ancona                    | Marche    |
| Ospedale A. Cardarelli                                             | Campobasso                | Molise    |
| Azienda Ospedaliera Nazionale SS. Antonio e Biagio e Cesare Arrigo | Alessandria               | Piemonte  |
| Azienda Sanitaria Ospedaliera S. Croce e Carle                     | Cuneo                     | Piemonte  |
| ASL TO5 Ospedale Santa Croce                                       | Moncalieri                | Piemonte  |
| Azienda Ospedaliera Maggiore della Carità                          | Novara                    | Piemonte  |
| AO Ordine Mauriziano Ospedale Umberto I                            | Torino                    | Piemonte  |
| PO Maria Vittoria                                                  | Torino                    | Piemonte  |
| Ospedale Infantile Regina Margherita                               | Torino                    | Piemonte  |
| Ospedale Generale Regionale "F. Miulli"                            | Acquaviva delle Fonti     | Puglia    |
| Ospedale "Di Venere" - Carbonara                                   | Bari                      | Puglia    |
| AOU Consorziata Policlinico                                        | Bari                      | Puglia    |
| Azienda Ospedaliera "A. Perrino"                                   | Brindisi                  | Puglia    |
| Ospedali Riuniti                                                   | Foggia                    | Puglia    |
| Azienda Ospedaliera "Vito Fazzi"                                   | Lecce                     | Puglia    |
| Ospedale Casa Sollievo della Sofferenza                            | San Giovanni Rotondo      | Puglia    |
| Azienda Ospedaliera SS. Annunziata di Taranto                      | Taranto                   | Puglia    |
| Azienda Ospedaliera "Card. G. Panico" di Tricase                   | Tricase                   | Puglia    |
| Azienda Ospedaliera Universitaria Clinica Pediatrica Macciotta     | Cagliari                  | Sardegna  |
| Azienda Ospedaliera Universitaria di Sassari                       | Sassari                   | Sardegna  |
| ASP Agrigento POS S. Giovanni di Dio                               | Agrigento                 | Sicilia   |
| ARNAS Garibaldi                                                    | Catania                   | Sicilia   |
| "AOU Policlinico – Vittorio Emanuele" PO Santo Bambino             | Catania                   | Sicilia   |
| ARNAS Garibaldi                                                    | Catania                   | Sicilia   |
| AO Cannizzaro                                                      | Catania                   | Sicilia   |
| "AOU Policlinico – Vittorio Emanuele" PO Gaspare Rodolico          | Catania                   | Sicilia   |
| ASP Enna PO Umberto I                                              | Enna                      | Sicilia   |
| AOUP Messina                                                       | Messina                   | Sicilia   |
| Azienda Ospedaliera Papardo                                        | Messina                   | Sicilia   |
| ARNAS Civico                                                       | Palermo                   | Sicilia   |
| Ospedale Buccheri La Ferla Fatebenefratelli                        | Palermo                   | Sicilia   |
| ASL Palermo PO Ingrassia                                           | Palermo                   | Sicilia   |
| Ospedali Riuniti Cervello -Villa Sofia                             | Palermo                   | Sicilia   |
| Università di Palermo - Azienda Policlinico                        | Palermo                   | Sicilia   |
| ASP Messina PO Patti                                               | Patti                     | Sicilia   |
| ASP Ragusa PO Maria Paterno' Arezzo                                | Ragusa                    | Sicilia   |
| ASP Siracusa PO Umberto I                                          | Siracusa                  | Sicilia   |

|                                                                             |                  |                     |
|-----------------------------------------------------------------------------|------------------|---------------------|
| ASP Messina PO Taormina                                                     | Taormina         | Sicilia             |
| ASP Trapani POS Antonio Abate                                               | Trapani          | Sicilia             |
| Ospedale San Donato                                                         | Arezzo           | Toscana             |
| AOU Careggi                                                                 | Firenze          | Toscana             |
| AOU Meyer                                                                   | Firenze          | Toscana             |
| Nuovo Ospedale San Giovanni di Dio                                          | Firenze          | Toscana             |
| Ospedale Versilia - Lido di Camaiore                                        | Lido di Camaiore | Toscana             |
| AOU Pisana - Stabilimento di Santa Chiara                                   | Pisa             | Toscana             |
| Ospedale di Prato Santo Stefano                                             | Prato            | Toscana             |
| Azienda Ospedaliera Universitaria Senese - Ospedale Santa Maria alle Scotte | Siena            | Toscana             |
| Ospedale di Bolzano                                                         | Bolzano          | Trentino-Alto Adige |
| Ospedale S.Chiara                                                           | Trento           | Trentino-Alto Adige |
| Azienda Ospedaliera di Perugia                                              | Perugia          | Umbria              |
| Azienda Ospedaliera Santa Maria                                             | Terni            | Umbria              |
| Ospedale di Camposampiero                                                   | Camposampiero    | Veneto              |
| Ospedale dell'Angelo                                                        | Mestre           | Veneto              |
| Azienda Ospedaliera Policlinico di Padova                                   | Padova           | Veneto              |
| Ospedale Ca' Foncello                                                       | Treviso          | Veneto              |
| Azienda Ospedaliera Universitaria Integrata di Verona                       | Verona           | Veneto              |
| Ospedale San Bortolo                                                        | Vicenza          | Veneto              |
