# Supplementary material for: Use of intravenous sodium bicarbonate in neonatal intensive care units in Italy: a nationwide survey
Source: Ital J Pediatr. 2021 Mar 11;47:63. doi: 10.1186/s13052-021-00955-3 (PMC7953611; doi:10.1186/s13052-021-00955-3)
Supplement: Supplementary file 1 — Additional file 1. [file 13052_2021_955_MOESM1_ESM.pdf]

## ***Utilizzo del Bicarbonato di Sodio nelle Unità di Terapia Intensiva Neonatale in Italia***

Caro Collega,

come GdS di Farmacoterapia Neonatale, stiamo conducendo una indagine conoscitiva sull'utilizzo del bicarbonato di sodio in Terapia Intensiva Neonatale (UTIN) in Italia. La invitiamo a completare questo breve questionario, che abbiamo inviato a tutti i direttori delle UTIN presenti sul territorio nazionale. I dati raccolti verranno trattati in forma anonima e confidenziale. I risultati definitivi verranno presi in considerazione per una eventuale pubblicazione su riviste scientifiche *peer-reviewed*.

Non esiti a contattarci per ulteriori chiarimenti:

email: [redacted] mobile: +39 [redacted]

email: [redacted] mobile: +39 [redacted]

Grazie in anticipo per il tempo e la collaborazione.

*GdS Farmacoterapia Neonatale*

*Può rispondere al questionario online all'indirizzo*

<https://goo.gl/forms/nMn3KTyNb6xNQv9K2>

*oppure inviare una scansione/foto del questionario compilato via email o mediante Whatsapp ai riferimenti sopra citati*

**1) La UTIN che Lei dirige annualmente assiste:**

☐ <1000 nati   ☐ 1000-2000 nati   ☐ >2000 nati   ☐ solo neonati outborn

**2) Nella UTIN che Lei dirige è pratica comune la correzione dell'acidosi metabolica con  $\text{NaHCO}_3$  e.v.?:**

☐ no   ☐ sì

**3) Se ha risposto “No” alla domanda n. 2), quali altre strategie terapeutiche vengono impiegate per la correzione dell'acidosi metabolica? (anche più di una risposta):**

☐ modifica dei parametri ventilatori

☐ miglioramento della perfusione

☐ boli di volume

☐ altro (specificare) .....

**4) Se ha risposto “Sì” alla domanda n. 2), avete dei valori limite di pH per la correzione con  $\text{NaHCO}_3$  ev?**

☐ no

☐  $\text{pH} \leq 7,30$    ☐  $\text{pH} \leq 7,20$    ☐  $\text{pH} \leq 7,10$

☐ altro (specificare) .....

**5) Se ha risposto “Sì” alla domanda n. 2), avete dei valori limite di EB per la correzione con  $\text{NaHCO}_3$  ev?**

☐ no

☐  $\text{EB} \leq -5 \text{ mEq/L}$    ☐  $\text{EB} \leq -8 \text{ mEq/L}$    ☐  $\text{EB} \leq -10 \text{ mEq/L}$

☐ altro (specificare) .....

**6) Se ha risposto “Sì” alla domanda n. 2), avete dei valori limite di Lattati per la correzione con  $\text{NaHCO}_3$  ev?**

☐ no

☐ Lattati  $>2\text{mmol/L}$    ☐ Lattati  $>5\text{mmol/L}$

- ☐ altro (specificare) .....
- 7) Se hai risposto “Sì” alla domanda n. 2), che dosaggio di  $\text{NaHCO}_3$  utilizzate rispetto alla formula per la correzione del deficit (peso x EB x 0,3)?**
- ☐ la dose totale  
☐ metà dose  
☐ un terzo della dose  
☐ 1mEq/kg  
☐ altro (specificare) .....
- 8) Se hai risposto “Sì” alla domanda n. 2), cosa utilizzate per la diluizione?**
- ☐ acqua distillata  
☐ soluzione fisiologica  
☐ altro (specificare) .....
- 9) Se hai risposto “Sì” alla domanda n. 2), che rapporto utilizzate per la diluizione?**
- ☐ 1:1  
☐ 1:2  
☐ 1:3  
☐ 1:4  
☐ altro (specificare) .....
- 10) Se hai risposto “Sì” alla domanda n. 2), che modalità di somministrazione utilizzate?**
- ☐ bolo ev ( $\leq 30$  min)  
☐ infusione lenta (30-60 min)  
☐ bolo + infusione lenta  
☐ altro (specificare) .....
- 11) Nella UTIN che Lei dirige utilizzate il  $\text{NaHCO}_3$  solo in alcune particolari patologie?**
- ☐ no   ☐ sì
- 12) Se nella UTIN che Lei dirige utilizzate il  $\text{NaHCO}_3$  solo in alcune patologie, quali sono? (anche più di una risposta)**
- ☐ acidosi tubulare  
☐ patologie con perdita di bicarbonato  
☐ altro (specificare) .....
- 13) Nei componenti della Nutrizione Parenterale prescritta nella UTIN che lei dirige sono presenti ...**
- ☐ acetato  
☐ lattato  
☐ acetato e lattato  
☐ non sono presenti acetato e lattato  
☐ altri sistemi tampone (specificare).....
- 14) Nella UTIN che Lei dirige si sono mai verificate lesione da stravasamento di  $\text{NaHCO}_3$ ?**
- ☐ no   ☐ sì

**Commenti al questionario**

.....

.....

.....

.....
